# Supplementary material for: Polygenic Risk Score Contribution to Psychosis Prediction in a Target Population of Persons at Clinical High Risk
Source: Atypon-hosted journal article supplement (doi:10.1176/appi.ajp.2019.18060721), 2019-11-12
Supplement: appi.ajp.2019.18060721.ds001.pdf [file appi.ajp.2019.18060721.ds001.pdf]

FIGURE S1. First and second principal components (PC1 and PC2) for 1000 Genomes and NAPLS subjects color-coded by self-reported ancestry

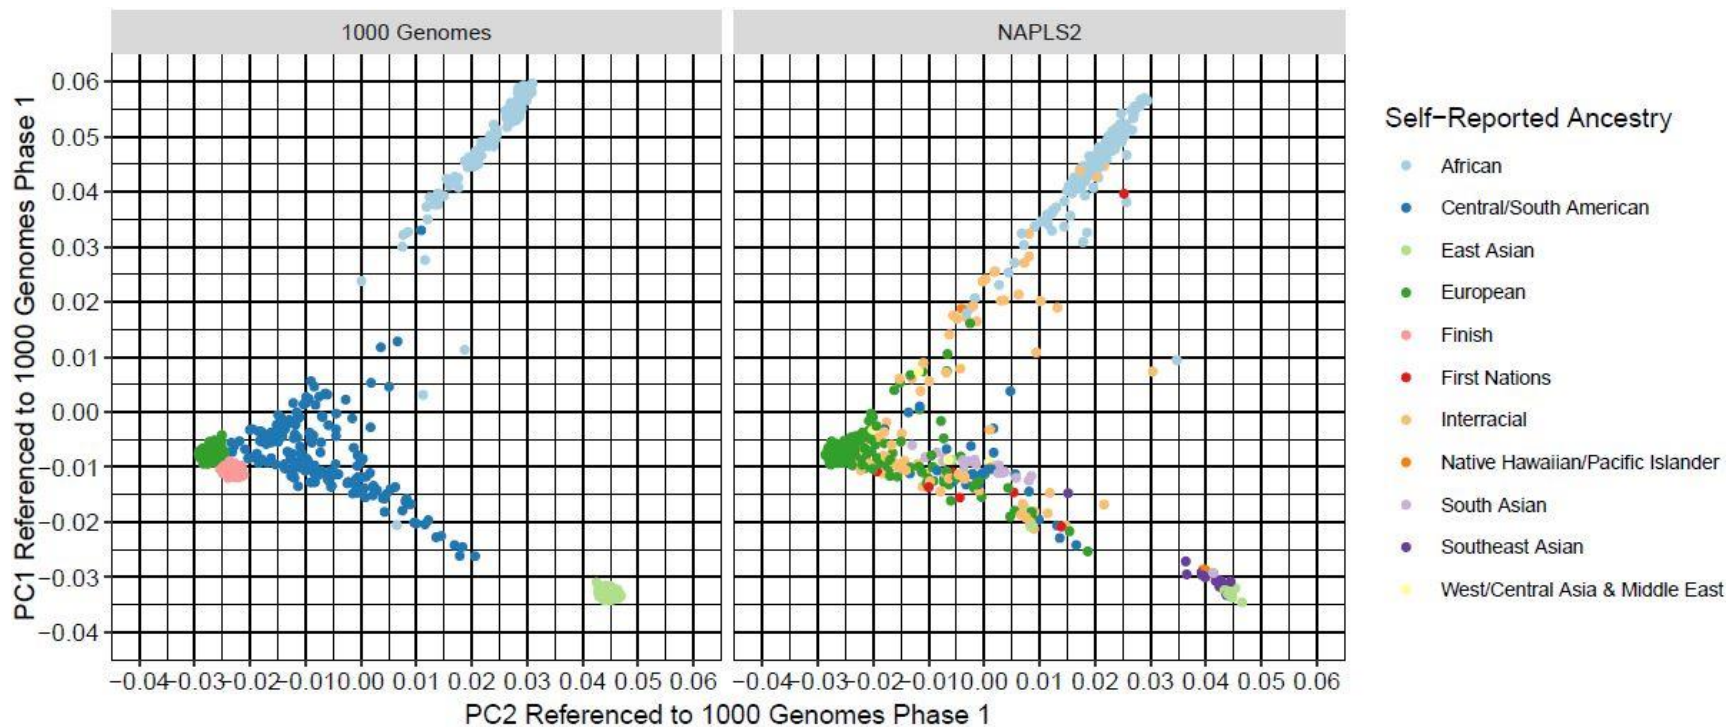

TABLE S1. Characteristics of clinical high-risk subjects who were and were not followed in NAPLS2<sup>a</sup>

| Variable                                                                | Followed <sup>a</sup> (N=595) |      | Not Followed (N=147) |      | Statistical Analysis |      | Missing Values <sup>b</sup> |      |
|-------------------------------------------------------------------------|-------------------------------|------|----------------------|------|----------------------|------|-----------------------------|------|
|                                                                         | Mean                          | SD   | Mean                 | SD   | t                    | p    | N                           | %    |
| Age (years)                                                             | 18.5                          | 4.3  | 18.8                 | 4.2  | -0.88                | 0.38 | 0                           | 0.0  |
| Modified <sup>c</sup> SIPS items P1 + P2, summed score                  | 2.6                           | 1.6  | 2.6                  | 1.6  | 0.07                 | 0.94 | 0                           | 0.0  |
| BACS <sup>d</sup> symbol coding, raw score (number completed)           | 56.8                          | 13.1 | 57.9                 | 11.6 | -0.81                | 0.42 | 22                          | 3.7  |
| Hopkins Verbal Learning Test–Revised, trials 1–3 summed                 | 25.6                          | 5.2  | 25.1                 | 5.4  | 0.85                 | 0.39 | 21                          | 3.5  |
| Stressful life events                                                   | 10.5                          | 5.5  | 10.0                 | 5.6  | 0.90                 | 0.37 | 69                          | 11.6 |
|                                                                         | N                             | %    | N                    | %    | $\chi^2$             | p    | N                           | %    |
| Family history of psychosis                                             | 96                            | 16.1 | 18                   | 12.2 | 1.38                 | 0.24 | 2                           | 0.3  |
| Decline in functioning $\geq 0$ on the Global Functioning: Social scale | 270                           | 45.4 | 75                   | 53.5 | 3.05                 | 0.08 | 1                           | 0.2  |
| Traumas $\geq 1$                                                        | 289                           | 56.2 | 48                   | 48.5 | 2.00                 | 0.16 | 82                          | 13.7 |
| Male                                                                    | 344                           | 57.7 | 77                   | 52.4 | 1.36                 | 0.24 | 0                           | 0.0  |

<sup>a</sup> Thus full NAPLS cohort includes 1042 subjects; 763 high-risk and 279 unaffected subjects. There were 21 high-risk subjects that did not meet Criteria of Psychosis-Risk States criteria (instead only met criteria that included age less than 18, schizotypy, and decline in function), leaving 742 high-risk subjects meeting COPS criteria, with 92 high-risk converters and 650 non-converters. However, 8 subjects converted after 2 year follow-up, so for 2-year survival are considered non-converters. There were 147 subjects excluded because of no follow-up (thus their status of converter or non-converter was not known). Thus, the final cohort consisted of 84 converters and 511 non-converters. Among those followed.

<sup>b</sup> Missing values were multiply imputed with the multivariate imputation by chained equations method prior to use in prediction analyses.

<sup>c</sup> Modified such that all levels in the nonprodromal range (0–2 on the original scale) are recoded as 0, levels in the prodromal range (3–5 on the original scale) are recoded as 1–3, and psychotic intensity (6 on the original scale) is recoded as 4.

<sup>d</sup> BACS=Brief Assessment of Cognition in Schizophrenia; NAPLS-2=second phase of the North American Prodrome Longitudinal Study; SIPS=Structured Interview for Prodromal Syndromes.

TABLE S2. Effect of different p-value thresholds when generating the schizophrenia PRS

| Ancestry     | p-value cut-off | Clinical       |              | Wald Z | p      | R <sup>2</sup> 2YR    | R <sup>2</sup> 2YR    | R <sup>2</sup> 2YR    |
|--------------|-----------------|----------------|--------------|--------|--------|-----------------------|-----------------------|-----------------------|
|              |                 | High-Risk<br>n | Control<br>n |        |        | Psychosis<br>Risk=10% | Psychosis<br>Risk=20% | Psychosis<br>Risk=30% |
| All          | 0.00000001      | 80             | 248          | 0.44   | 0.6597 | 0                     | 0                     | 0                     |
|              | 0.000001        |                |              | 0.37   | 0.7130 | 0                     | 0                     | 0                     |
|              | 0.00001         |                |              | 1.01   | 0.3101 | 0.000                 | 0.000                 | 0.000                 |
|              | 0.0001          |                |              | 1.21   | 0.2248 | 0.004                 | 0.004                 | 0.005                 |
|              | 0.001           |                |              | 2.42   | 0.0154 | 0.033                 | 0.041                 | 0.045                 |
|              | 0.01            |                |              | 3.40   | 0.0007 | 0.074                 | 0.091                 | 0.100                 |
|              | 0.05            |                |              | 3.13   | 0.0018 | 0.061                 | 0.075                 | 0.083                 |
|              | 0.1             |                |              | 3.12   | 0.0018 | 0.061                 | 0.074                 | 0.082                 |
| European     | 0.00000001      | 32             | 92           | 0.71   | 0.4749 | 0                     | 0                     | 0                     |
|              | 0.000001        |                |              | 1.06   | 0.2910 | 0.004                 | 0.005                 | 0.006                 |
|              | 0.00001         |                |              | 2.23   | 0.0260 | 0.007                 | 0.009                 | 0.010                 |
|              | 0.0001          |                |              | 2.44   | 0.0145 | 0.097                 | 0.118                 | 0.130                 |
|              | 0.001           |                |              | 2.11   | 0.0353 | 0.061                 | 0.075                 | 0.083                 |
|              | 0.01            |                |              | 2.68   | 0.0075 | 0.111                 | 0.135                 | 0.148                 |
|              | 0.05            |                |              | 2.44   | 0.0145 | 0.092                 | 0.112                 | 0.124                 |
|              | 0.1             |                |              | 2.57   | 0.0102 | 0.106                 | 0.128                 | 0.141                 |
| Non-European | 0.00000001      | 48             | 158          | -0.02  | 0.9880 | 0.00                  | 0.00                  | 0.00                  |
|              | 0.000001        |                |              | -0.43  | 0.6695 | 0.00                  | 0.00                  | 0.00                  |
|              | 0.00001         |                |              | -0.64  | 0.5204 | 0.00                  | 0.00                  | 0.00                  |
|              | 0.0001          |                |              | -0.55  | 0.5841 | 0.00                  | 0.00                  | 0.00                  |
|              | 0.001           |                |              | 1.34   | 0.1807 | 0.011                 | 0.014                 | 0.015                 |
|              | 0.01            |                |              | 2.17   | 0.0303 | 0.043                 | 0.053                 | 0.059                 |
|              | 0.05            |                |              | 2.00   | 0.0456 | 0.034                 | 0.042                 | 0.048                 |
|              | 0.1             |                |              | 1.87   | 0.0619 | 0.026                 | 0.033                 | 0.036                 |

TABLE S3. Effect of different p-value thresholds when generating the bipolar PRS

| Ancestry | p-value cut-off | Clinical High-Risk |           | Wald Z | p      | R <sup>2</sup> 2YR | R <sup>2</sup> 2YR | R <sup>2</sup> 2YR |
|----------|-----------------|--------------------|-----------|--------|--------|--------------------|--------------------|--------------------|
|          |                 | n                  | Control n |        |        | Psychosis Risk=10% | Psychosis Risk=20% | Psychosis Risk=30% |
| All      | 0.00000001      | 80                 | 248       | -0.28  | 0.7829 | 0.00               | 0.00               | 0.00               |
|          | 0.000001        |                    |           | -2.12  | 0.0337 | 0.02               | 0.03               | 0.03               |
|          | 0.00001         |                    |           | -1.00  | 0.3193 | 0.00               | 0.00               | 0.00               |
|          | 0.0001          |                    |           | -1.64  | 0.1015 | 0.00               | 0.00               | 0.00               |
|          | 0.001           |                    |           | -0.51  | 0.6096 | 0.00               | 0.00               | 0.00               |
|          | 0.01            |                    |           | -0.05  | 0.9638 | 0.00               | 0.00               | 0.00               |
|          | 0.05            |                    |           | 0.31   | 0.7546 | 0.00               | 0.00               | 0.00               |
|          | 0.1             |                    |           | 0.40   | 0.6910 | 0.00               | 0.00               | 0.00               |
| European | 0.00000001      | 32                 | 92        | 0.78   | 0.4336 | 0.00               | 0.00               | 0.00               |
|          | 0.000001        |                    |           | 0.29   | 0.7693 | 0.00               | 0.00               | 0.00               |
|          | 0.00001         |                    |           | 0.65   | 0.5166 | 0.00               | 0.00               | 0.00               |
|          | 0.0001          |                    |           | 0.00   | 0.9999 | 0.00               | 0.00               | 0.00               |
|          | 0.001           |                    |           | 0.39   | 0.6987 | 0.00               | 0.00               | 0.00               |
|          | 0.01            |                    |           | 0.07   | 0.9472 | 0.00               | 0.00               | 0.00               |
|          | 0.05            |                    |           | 0.20   | 0.8380 | 0.00               | 0.00               | 0.00               |
|          | 0.1             |                    |           | 0.41   | 0.6826 | 0.00               | 0.00               | 0.00               |
